# Supplementary material
Source: PubMed Central journal article supplement (PMC2994647)
Supplement: NIHMS250684-supplement-Supplement_Survey.pdf [file NIHMS250684-supplement-Supplement_Survey.pdf]

STUDY OF  
BLOOD CLOTS IN THE LEGS  
OR IN THE LUNGS

SURVEY RESEARCH CENTER

We appreciate your help in this study and hope that you are willing to provide the information. If you do not wish to complete the questionnaire, please indicate this below and return this letter since it will make a follow-up call unnecessary. Please understand that your current or future medical care at the Mayo Clinic will not be affected by your decision. Specifically, your care will not be jeopardized if you choose not to complete the questionnaire.

Sincerely,

I do not wish to participate further in this survey.

Please enter above any missing information or change any that is incorrect.

**Instructions: Please check the appropriate box or fill in the blank as indicated.**

8-13 Today's Date \_\_\_\_/\_\_\_\_/\_\_\_\_  
Month Day Year

14\_ 1. Do you recall having a blood clot in your leg (DVT or deep venous thrombosis)?  
1  No 2  Yes

15\_ 2. Do you recall having a blood clot in your lung(s) (pulmonary embolism)?  
1  No 2  Yes

16\_ 3. Do you now have or have you ever noticed any changes in the color or pigmentation  
in the skin around your ankles?  
1  No 2  Yes

17\_ 4. Do you now have or have you ever noticed any thickening of the skin on your legs or  
around your ankles?  
1  No 2  Yes

18\_ 5. Do you now have or have you ever noticed any sores or ulcers on your legs or  
ankles that appeared spontaneously or after relatively minor injuries, and were  
unusually slow in healing or have persisted?  
1  No 2  Yes

19\_ 6. During the past 4 weeks have you had or do you have any swelling of your  
legs or ankles?  
1  No 2  Yes

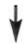

20\_ **If yes, how many days in the past 4 weeks did you have swelling?**  
1  All days 2  Most days 3  Some days 4  A few days

21\_ **Does the swelling usually resolve or markedly improve overnight?**  
1  No 2  Yes

22\_ **In which leg or legs do you usually have swelling?**  
1  Right 2  Left 3  Both

23\_ **Does the swelling usually affect both legs equally?**  
1  Yes, both about same 2  Right larger 3  Left larger

24\_ **How severe do you consider the swelling?**  
1  Severe 2  Moderate 3  Mild 4  Very mild

25\_ 7. Has a doctor ever recommended that you wear a special stocking because of your problem in one or both legs apart from when you might have been hospitalized, or had surgery, etc.?

1  No 2  Yes

26\_ If yes, do you currently wear special stocking(s)?

1  No 2  Yes

27\_ If yes, what kind of stocking(s) do you wear? (Check all that apply.)

- 28\_  TED stocking(s), these are usually white  
 Graduated compression stocking(s) such as Sigvaris, Medi, Jobst, Juzo, Camp, or Barton-Carey, (these are usually flesh colored)

29\_ Were you measured and custom fit for the stocking(s)?

1  No 2  Yes 3  Don't know

30\_ Are the stockings:

1  Knee high 2  Thigh high

31\_ How much difficulty do you have getting your stocking(s) on?

1  A great deal of difficulty 2  Some difficulty 3  A little difficulty 4  No difficulty

32\_ When do you usually put your stocking(s) on?

- 1  Before getting out of bed  
2  Immediately after getting out of bed  
3  A short time after getting out of bed  
4  A long time after getting out of bed

33\_ Do you have discomfort from wearing the stocking(s)?

1  No 2  Yes, when active 3  Yes, when resting

34\_ Within the past 4 weeks, how often did you wear the stocking(s)?

1  All days 2  Most days 3  Some days 4  Few days 5  No days

35\_ How many hours per day do you wear your stocking(s)?

1  Less than 1 hour 2  1 to 8 hours 3  9 to 12 hours 4  All day

36\_ Do you wear your stocking(s) as often as was recommended?

1  No 2  Yes

37\_ If no, why not? \_\_\_\_\_  
\_\_\_\_\_

How much of a problem are the following?

A big problem A little problem No problem

38\_ The cost of the stocking(s). . . . 1  2  3

39\_ The cleaning of the stocking(s). 1  2  3

40\_ The fitting of the stocking(s). 1  2  3

41\_ About how long have you had special stockings?

1  Less than 1 month 2  1 to 3 months 3  4 to 6 months 4  7 to 12 months 5  Over 12 months

42\_ How often do you replace your stocking(s)?

1  About every 3 months 2  About every 6 to 12 months 3  Yearly 4  Never

These questions refer to  
**PHYSICAL ABILITY TO GET AROUND.**

DURING THE PAST 4 WEEKS:

- |      |                                                                                    | All days                   | Most days                  | Some days                  | Few days                   | No days                    |
|------|------------------------------------------------------------------------------------|----------------------------|----------------------------|----------------------------|----------------------------|----------------------------|
| 43__ | 8. How often were you physically able to drive a car or use public transportation? | 1 <input type="checkbox"/> | 2 <input type="checkbox"/> | 3 <input type="checkbox"/> | 4 <input type="checkbox"/> | 5 <input type="checkbox"/> |
| 44__ | 9. How often were you out of the house for at least part of the day? .....         | 1 <input type="checkbox"/> | 2 <input type="checkbox"/> | 3 <input type="checkbox"/> | 4 <input type="checkbox"/> | 5 <input type="checkbox"/> |
| 45__ | 10. How often were you able to do errands in the neighborhood? .....               | 1 <input type="checkbox"/> | 2 <input type="checkbox"/> | 3 <input type="checkbox"/> | 4 <input type="checkbox"/> | 5 <input type="checkbox"/> |
| 46__ | 11. How often did someone have to assist you to get around outside your home? ...  | 1 <input type="checkbox"/> | 2 <input type="checkbox"/> | 3 <input type="checkbox"/> | 4 <input type="checkbox"/> | 5 <input type="checkbox"/> |
| 47__ | 12. How often were you in a bed or chair for most or all of the day? .....         | 1 <input type="checkbox"/> | 2 <input type="checkbox"/> | 3 <input type="checkbox"/> | 4 <input type="checkbox"/> | 5 <input type="checkbox"/> |

These questions refer to  
**WALKING AND BENDING.**

DURING THE PAST 4 WEEKS:

- |      |                                                                                                                                                  | All days                   | Most days                  | Some days                  | Few days                   | No days                    |
|------|--------------------------------------------------------------------------------------------------------------------------------------------------|----------------------------|----------------------------|----------------------------|----------------------------|----------------------------|
| 48__ | 13. How often did you have trouble doing vigorous activities such as running, lifting heavy objects, or participating in strenuous sports? ..... | 1 <input type="checkbox"/> | 2 <input type="checkbox"/> | 3 <input type="checkbox"/> | 4 <input type="checkbox"/> | 5 <input type="checkbox"/> |
| 49__ | 14. How often did you have trouble either walking several blocks or climbing a few flights of stairs? .....                                      | 1 <input type="checkbox"/> | 2 <input type="checkbox"/> | 3 <input type="checkbox"/> | 4 <input type="checkbox"/> | 5 <input type="checkbox"/> |
| 50__ | 15. How often did you have trouble either walking one block or climbing one flight of stairs? .....                                              | 1 <input type="checkbox"/> | 2 <input type="checkbox"/> | 3 <input type="checkbox"/> | 4 <input type="checkbox"/> | 5 <input type="checkbox"/> |
| 51__ | 16. How often were you unable to walk unless assisted by another person or by a cane, crutches, or walker? .....                                 | 1 <input type="checkbox"/> | 2 <input type="checkbox"/> | 3 <input type="checkbox"/> | 4 <input type="checkbox"/> | 5 <input type="checkbox"/> |

These questions refer to  
LEG PAIN.

**DURING THE PAST 4 WEEKS:**

All days   Most days   Some days   Few days   No days

52\_ 17. How often did you have severe pain from one or both of your legs? .. 1  2  3  4  5

53\_ 18. How often did you have pain in both legs at the same time? ..... 1  2  3  4  5

54\_ 19. How often did leg pain make it difficult for you to sleep? ..... 1  2  3  4  5

55\_ 20. How often have you had difficulty in prolonged sitting as a result of pain in your leg(s)? ..... 1  2  3  4  5

56\_ 21. How often have you had difficulty with prolonged standing in the same place as a result of pain or discomfort in one or both legs? ..... 1  2  3  4  5

**DURING THE PAST 4 WEEKS:**

Severe   Moderate   Mild   Very mild   None

57\_ 22. How would you describe the leg pain you usually had? ..... 1  2  3  4  5

Now I'd like to ask you about some of the activities of daily living, things that we all need to do as a part of our daily lives. I would like to know if you can do these activities without any help at all, or if you need some help to do them, or if you can't do them at all.

58\_\_

**23. Can you use the telephone:**

- 1  without help, including looking up numbers and dialing
- 2  with some help (can answer phone or dial operator in an emergency, but need a special phone or help in getting the number or dialing)
- 3  or are you completely unable to use the telephone

59\_\_

**24. Can you get to places out of walking distance:**

- 1  without help (can travel alone on buses, taxis, or drive your own car)
- 2  with some help (need someone to help you or go with you when traveling)
- 3  or are you unable to travel unless emergency arrangements are made for a specialized vehicle like an ambulance

60\_\_

**25. Can you go shopping for groceries or clothes (assuming you have transportation):**

- 1  without help (taking care of all shopping needs yourself, assuming you had transportation)
- 2  with some help (need someone to go with you on all shopping trips)
- 3  or are you completely unable to do any shopping

61\_\_

**26. Can you prepare your own meals:**

- 1  without help (plan and cook full meals yourself)
- 2  with some help (can prepare some things but unable to cook full meals yourself)
- 3  or are you completely unable to prepare any meals

62\_\_

**27. Can you do your housework:**

- 1  without help (can scrub floors, etc.)
- 2  with some help (can do light housework but need help with heavy work)
- 3  or are you completely unable to do any housework

63\_\_

**28. Can you take your own medicine:**

- 1  without help (in the right doses at the right time)
- 2  with some help (able to take medicine if someone prepares it for you and/or reminds you to take it)
- 3  or are you completely unable to take your medicines

64\_\_

**29. Can you handle your own money:**

- 1  without help (write checks, pay bills, etc.)
- 2  with some help (manage day-to-day buying but need help with managing your checkbook and paying your bills)
- 3  or are you completely unable to handle money

65\_\_

**30. Are you in a wheelchair?**

- 1  No
- 2  Yes

66\_ 31. During the past 2 weeks, did you work at any time at a job or business not counting work around the house? (Include unpaid work in the family [farm/business].)

1  No      2  Yes

67\_ **If no, even though you did not work during those 2 weeks, did you have a job or business?**

1  No      2  Yes

68\_ 32. During the past 2 weeks, did you miss any time from a job or business because of a leg problem?

1  No      2  Yes

69-70 **If yes, during that 2-week period, how many days did you miss more than half of your scheduled work time from your job or business because of your leg problem?**

\_\_\_\_\_ Number of work-loss days (enter 0 if none)

71\_ 33. During the past 2 weeks, did you miss any time from school because of your leg problem?

1  No      2  Yes

72-73 **If yes, during that 2-week period, how many days did you miss more than half of the day from school because of your leg problem?**

\_\_\_\_\_ Number of school-loss days

74\_ 34. During the past 2 weeks, did you stay in bed because of your leg problem?

1  No      2  Yes

75-76 **If yes, during that 2-week period, how many days did you stay in bed more than half of the day because of your leg problem?**

\_\_\_\_\_ Number of bed days

77-78 35. Not counting the day(s) in bed, was there any other time during those 2 weeks that you cut down on the things you usually do because of your leg problem?

\_\_\_\_\_ Number of cut-down days

79-80 36. Again, not counting the day(s) missed from school, was there any other time during those 2 weeks that you cut down on the things you usually do because of your leg problem?

\_\_\_\_\_ Number of cut-down days



81\_ 37. Are you currently on any blood thinner (anticoagulation) medication such as Coumadin or warfarin?

1  No 2  Yes

82\_ 38. Have you ever been on any blood thinner (anticoagulation) medication such as Coumadin or warfarin?

1  No 2  Yes 3  I don't know

83-88 **If yes, for how long?** (enter number of weeks or months or years)

\_\_\_\_\_ weeks OR \_\_\_\_\_ months OR \_\_\_\_\_ years  
number number number

89\_ **While on treatment, did you experience any bleeding?**

1  No 2  Yes

90\_ **How much of a concern were the following to you?**

A great concern    Somewhat of a concern    Not a concern

91\_ **Interaction of Coumadin or warfarin with other medications . . . . .** 1  2  3

92\_ **Bleeding risk . . . . .** 1  2  3

93\_ **Inconvenience of having to have protime or "PT" blood levels taken for monitoring. . . . .** 1  2  3

94-95 **People often have difficulty taking or remembering to take their pills for one reason or another. Have you ever missed any or taken more than you were suppose to of your Coumadin or warfarin pills when you were taking them?**

1  No 2  Yes

96-97 **In a typical 4 weeks, on days you were supposed to take your pill(s), how many days did you miss taking your pill(s)?**

\_\_\_\_\_ number of days

**In a typical 4 weeks, on how many days did you take extra Coumadin or warfarin pill(s)?**

\_\_\_\_\_ number of days

Thank you!
